## Cold adaptation drives population genomic divergence in the ecological specialist, *Drosophila montana*

Wiberg, R. A. W.<sup>1,+</sup>, Tyukmaeva, V.<sup>2+</sup>, Hoikkala, A.<sup>2</sup>, Ritchie, M. G.<sup>1</sup> & Kankare, M.<sup>2,\*</sup>

3

**1. Centre for Biological Diversity**, School of Biology, University of St Andrews, St Andrews, KY16 9TH, Scotland, UK. **2.** Department of Biological and Environmental Science, University of Jyväskylä, Jyväskylä, 40014, Finland. **+Present addresses: RAWW** University of Basel, Department of Environmental Sciences, Zoological Institute, Vesalgasse 1, 4051 Basel, Switzerland **TV** Centre d'Ecologie Fonctionnelle et Evolutive, CNRS, Montpellier, France.

9

**Keywords:** Environmental adaptation, genomic divergence, cold tolerance, CTmin, CCRT, *D. montana*, cline populations

15

## ABSTRACT

18 Detecting signatures of ecological adaptation in comparative genomics is challenging, but  
analysing population samples with characterised geographic distributions, such as clinal variation,  
can help identify genes showing covariation with important ecological variation. Here we analysed  
21 patterns of geographic variation in the cold-adapted species *Drosophila montana* across phenotypes,  
genotypes and environmental conditions and searched for signatures of cold adaptation in  
populations' genomic divergence. We first derived the climatic variables associated with the  
24 geographic distribution of 24 populations across two continents to trace the whole scale of  
environmental variation experienced by the species, and measure variation in the cold tolerance of  
the flies of six populations from different geographic contexts. We then performed pooled whole  
genome sequencing of these six populations, and used Bayesian methods to identify SNPs where  
27 genetic differentiation is associated with both climatic variables and the population phenotypic  
measurements. The top candidate SNPs were enriched on the X and 4<sup>th</sup> chromosomes, and they also  
lie near genes implicated in other studies of cold tolerance and population divergence in this species  
30 and its close relatives. We conclude that ecological adaptation has contributed to the divergence of  
*D. montana* populations throughout the genome and in particular on the X and 4<sup>th</sup> chromosomes,  
which also showed highest interpopulation  $F_{st}$ . This study demonstrates that ecological selection can  
33 drive genomic divergence at different scales, from candidate genes to chromosome-wide effects.

## INTRODUCTION

36 The geographic structure of a species is a result of its phylogeographic history, influenced  
by past and present dispersal, population demography and selection. Obtaining genome-wide data  
on SNP genetic polymorphisms across multiple populations of a species is becoming relatively  
39 easy, but interpreting the patterns of geographic variation in such data and identifying genes which  
vary primarily due to selection remains challenging. Often a simple 'outlier' approach using  
genome scans which measures genetic differentiation such as  $F_{st}$  or  $D_{xy}$  is adopted, but results are  
42 difficult to interpret due to confounds between selection, drift and population structure, or genomic  
features such as inversions and other causes of variation in recombination rate (Noor & Bennet,  
2009; Cruickshank & Hahn, 2014; Wolf & Ellegren, 2016; Ravinet et al., 2017). If environmental  
45 data is available, we can use associations with such factors to help identify loci where  
differentiation covaries with this environmental variation. Genome scan methods can incorporate  
environmental variation and simultaneously fit effects for covariance with environmental factors,  
48 and other population processes. This approach has successfully identified genetic variation  
associated with altitude in humans, among other examples (Foll, Gaggiotti, Daub, Vatsiou, &

Excoffier, 2014; de Villemereuil & Gaggiotti, 2015; Gautier, 2015) and has become a useful  
51 approach to investigate the ecological adaptations underlying population divergence.

Clinal patterns of variation in phenotypes or gene frequencies have a long history of being  
used to infer selection along ecotones, and analyses of cline shape can sometimes identify loci  
54 under direct selection from others showing clinal variation for other reasons such as  
phylogeographic history (Barton & Gale, 1993). Such studies can be very powerful, especially  
when independent parallel clines are available. For example, Kolaczowski, Kern, Holloway &  
57 Begun (2011) sampled isofemale lines from extremes of a cline in Australian populations of *D.*  
*melanogaster*, and found many genes implicated in clinaly varying phenotypes to show highest  
differentiation. Also, Bergland, Behrman, O'Brien, Schmidt & Petrov (2014); Kapun, Fabian,  
60 Goudet & Flatt (2016) sampled North American clines in *D. melanogaster* and *D. simulans* over  
several years and seasons to uncover clinal and seasonal variation in genome scale. They found that  
many SNPs showed consistent seasonal fluctuations in allele frequencies throughout the clines,  
63 which indicates a regular response to seasonally varying selection pressures (Bergland et al., 2014).  
On the other hand, Machado et al. (2015) concluded that migration and gene flow play a greater  
role than adaptation in the overall clinality of genomic variants in *D. simulans* than *D.*  
66 *melanogaster*. While the two species share a significant proportion of the genes showing clinal  
variation, their differences in overwintering ability, migration and population bottlenecks probably  
act as additional drivers of differences in patterns of variation between them (Machado et al., 2015).  
69 Similar studies of clinal variation in phenotypes and allele frequencies have also been carried out in  
other insects (e.g. Paolucci, Salis, Vermeulen, Beukeboom, & van de Zande, 2016), plants (e.g.  
Chen et al., 2012; Bradbury, Smithson, & Krauss, 2013), mammals (e.g. Hoekstra, Drumm, &  
72 Nachman, 2004; Carneiro et al., 2013), fish (e.g. Vines et al., 2016), and other organisms (Endler,  
1973; Endler, 1977; Takahashi, 2015). However, the patterns of variation in allele frequencies are  
only rarely compared with potentially causal environmental variation or ecologically important  
75 traits, even though such studies are necessary to determine if adaptation to climate is directly  
driving patterns of genetic differentiation.

Here we investigate geographic variation at both the phenotypic and genetic level in  
78 *Drosophila montana* samples from two continents. This species has spread around the northern  
hemisphere (Throckmorton, 1969), and is one of the most cold-tolerant *Drosophila* species  
(Kellerman et al., 2012; Vigoder et al., 2016). The basic cold tolerance of *D. montana* flies can  
81 increase towards the cold seasons through two mechanisms, photoperiodic reproductive diapause  
(Vesala & Hoikkala, 2011) and cold-acclimation induced by a decrease in day length and/or  
temperature (Vesala, Salminen, Laiho, Hoikkala, & Kankare, 2012; Kauranen et al., 2019). *D.*  
84 *montana* populations have been found to show clinal variation in the critical day length required for

diapause induction (CDL) and its temperature-sensitivity. There is also a correlation between CDL and latitudinally co-varying climatic factors such as the mean temperature of the coldest month (Tyukmaeva, Lankinen, Kinnunen, Kauranen, & Hoikkala, 2020). In addition, *D. montana* populations from different geographic regions show variation in their courtship cues and mate choice (Routtu et al., 2007; Klappert, Mazzi, Hoikkala, & Ritchie, 2007), which has led to partial reproductive isolation between some distant populations (Jennings, Mazzi, Ritchie, & Hoikkala, 2011; Jennings, Snook, & Hoikkala, 2014). At the genetic level, differential gene expression studies have identified candidate genes underlying diapause (Kankare, Salminen, Laiho, Vesala, & Hoikkala, 2010; Kankare, Parker, Merisalo, Salminen, & Hoikkala, 2016), perception of day length (Parker, Ritchie, & Kankare, 2016), and cold acclimation (Parker et al., 2015). Furthermore, a quasi-natural selection experiment for shorter CDL, accompanied by a decrease in cold-tolerance, induced widespread changes in loci with potential roles with these traits (Kauranen et al., 2019). Finally, population genomic analyses has identified several outlier loci when examining differentiation between North American and European populations (Parker et al., 2018). All this makes *D. montana* an interesting example of nascent speciation, potentially influenced by ecological adaptation.

Here we ask to what extent the patterns in the genomic divergence of populations across continents are correlated with climatic variation and phenotypic responses to cold adaptation. We perform pooled whole genome sequencing (pool-seq) on six different populations and use Bayesian methods to examine the association between genomic differentiation between populations and environmental variables across both continents. We also phenotyped populations for two different cold tolerance measures, critical thermal minimum (CTmin) and chill coma recovery time (CCRT), and investigate the associations between them and the genetic and climatic data. Ultimately, we ask if the genomic loci showing an association between genetic and environmental differentiation also show association with population differentiation in cold tolerance phenotypes, and examine the possible overlap between the set of genes close to candidate SNPs with sets of candidate genes from other studies of cold adaptation in *D. montana*. If population differentiation is driven by ecological selection then we would predict the extreme cold adaptation of *D. montana* to have left a signature of genomic divergence across these loci.

114

## **METHODS**

### **Sample collections and DNA extractions**

117 We collected samples of 49-50 individuals from six *D. montana* populations from a range of latitudes from 66°N to 38°N in the spring of 2013 or 2014. Four of these populations represented a latitudinal cline in North America (N.A.), and two populations were from a latitudinal cline in

120 Finland (figure 1; table 1). Samples of wild-caught flies from the six populations were stored in  
Ethanol (the male/female ratio varied across samples; table 1) and DNA of individual flies was  
extracted using CTAB solution and phenol-chloroform-isoamylalcohol purifications in 2016.  
123 Genomic DNA was extracted from individual flies and quantified using Qubit (Thermo Fisher  
Scientific), and an equal amount of DNA from each individual (50 ng) was pooled into the final  
sample. Sequencing was performed at the Finnish Functional Genomics Centre in Turku, Finland  
126 ([www.btk.fi/functional-genomics](http://www.btk.fi/functional-genomics)) on the Illumina HiSeq3000 platform (paired-end reads, read  
length = 150bp, estimated coverage ~121x).

## 129 **Phenotyping**

We measured the critical thermal minimum (CT<sub>min</sub>) and chill coma recovery time (CCRT)  
of flies from six populations. Fly samples for these tests were collected for five populations  
132 (Seward, Terrace, Ashford, Crested Butte and Korpilahti) from population cages that have been  
maintained in the lab since 2013-2014. For the Oulanka population flies were collected from three  
isofemale strains (established in 2014), because the population of this population had been  
135 contaminated by another species. Newly emerged flies (<24 hours old) were anesthetized with CO<sub>2</sub>,  
separated by sex and kept in vials with yeast-malt media (Lakovaara, 1969) at constant light at  
19°C. The vials were changed weekly, until the flies reached sexual maturity at the age of 21-22  
138 days and were used in CT<sub>min</sub> and CCRT tests. The same individual flies were first used in the  
CT<sub>min</sub> experiment, then followed by the CCRT test.

CT<sub>min</sub> and CCRT tests were done in batches (21 in total) for 39 flies per population per sex  
141 on average (for Oulanka isofemale strains 30 flies per strain per sex were used). CT<sub>min</sub> tests are  
based on detecting the temperature (CT<sub>min</sub>) at which flies lose neuromuscular function and enter  
reversible state of chill coma (Andersen et al., 2015). In these tests, the flies were placed into tubes  
144 sealed with parafilm and submerged into a 30% glycol-water mixture in Julabo F32-HL chamber.  
The temperature was decreased at the rate of 0,5°C per minute (in range from 19°C to -6°C) and  
CT<sub>min</sub> was determined as the temperature at which a fly was unable to stand on its legs. After  
147 determining the flies' CT<sub>min</sub>, the temperature was increased to -6°C and the flies were left in this  
temperature for 16 hours. Then vials were quickly taken out of the glycol-water bath and the flies'  
CCRT was determined as the time required for the flies to recover from chill coma and stand on  
150 their legs.

To investigate population differences in CT<sub>min</sub> and CCRT phenotypes we fit linear mixed  
models (in R v. 3.6.2; R Development Core Team, 2019) using the “lme4” R package; Bates,  
153 Mächler, Bolker, & Walker, 2015). The full model included population and sex as fixed effects and  
experimental batch as a random effect. Fixed effects were tested by sequential comparison by a

likelihood ratio test and removed if they did not significantly improve the model fit (see  
156 supplementary R scripts).

### **Bioclimatic variables and population geography**

159 We obtained representative climate data from the WorldClim database (Hijmans, Cameron,  
Parra, Jones, & Jarvis, 2005) for each *D. montana* population sampled for the pool-seq (see above),  
as well as for 18 additional populations of this species used in our other studies, the R package  
162 “raster” (v. 2.5-8; Hijmans et al., 2016) in R. In total this amounts to 55 bioclimatic variables for  
each population (table S1). To reduce the number of variables in the dataset a principle components  
analysis (PCA) was performed using the “PCA()” function from the “FactoMineR” package (v.  
165 1.28; Lê, Josse, & Husson, 2008) in R. Principle components were kept for further analysis if their  
eigenvalues were  $> 1$ . PCA scores for each population were z-transformed using the “scale()”  
function in base R. Additionally, CTmin and CCRT were summarised to a mean value for each  
168 population. In total, this gives four “environmental” variables measured for each population (PC1,  
PC2, CTmin, and CCRT).

### **171 Mapping, SNP calling and genomic analysis**

Quality of reads was checked with FASTQC (v. 0.11.5) (Andrews, 2015) and reads were  
trimmed using trimmomatic (v. 0.32) (Bolger, Lohse, & Usadel, 2014). Trimmed reads were  
174 mapped to the *D. montana* reference genome (Parker et al., 2018) using BWA mem (v. 0.7.7) (Li,  
2013) with the default options but keeping only alignments with a mapping quality of  $> 20$   
following best practice guidelines for pool-seq (Schlötterer, Tobler, Kofler, & Nolte, 2014).  
177 Duplicate alignments were removed with samtools rmdup (v 1.3.1) (Li et al., 2009) and regions  
around indels were re-aligned using picard (v. 1.118, Broad Institute), GATK (v. 3.2-2, McKenna et  
al., 2010) and samtools. Separate .bam files for each of the sequenced sample were finally merged  
180 using bamtools (v. 2.4.0; Barnett, Garrison, Quinlan, Strömberg, & Marth, 2011).

Over 80% of reads were properly mapped in all samples. Empirical coverage was between  
~100 and 110x (table S2; figure S1) while the mean coverage for Seward samples was nearly twice  
183 that of the other samples (figure S1 and figure S2). To avoid the potential for this difference causing  
artefacts in downstream analyses the .bam files for Seward were down-sampled to contain 94.1  
million reads (the average across the remaining populations). The coverage was then much more  
186 similar among the populations, allowing common maximum and minimum thresholds to be set  
based on the aggregate distribution (figure S3). Allele frequencies at SNPs among the pools were  
called with samtools mpileup (v. 1.3.1; Li et al., 2009) using options to skip indel calling as well as  
189 ignoring reads with a mapping quality  $< 20$  and sites with a base quality  $< 15$ . This was followed by



the heuristic SNP calling software PoolSNP using a minimum count of five to call an allele, and a minimum coverage of 37 and a maximum coverage  $< 95^{\text{th}}$  percentile of the scaffold-wide coverage distribution to call a SNP (Kapun et al., 2019).  
192

To test for an association between the four environmental variables and genetic differentiation we used BayScEnv (v. 1.1; Foll & Gaggiotti, 2008; de Villemereuil & Gaggiotti, 195 2015). BayScEnv was run with five pilot runs of 1000 iterations each in length followed by a main chain of 4,000 iterations of which 2,000 were discarded as burn-in. Four MCMC chains were run for each analysis to evaluate convergence of parameter estimates. Because of the unbalanced 198 number of males (and therefore ratios of X:Y chromosomes) in the pools, BayScEnv analyses were performed separately on SNPs that could be assigned to the autosomal linkage groups (chromosomes) and the X chromosome. Raw count data were used for the autosomal data. For X 201 linked SNPs, allele count data were scaled to the known number of X chromosomes in the pool using  $n_{\text{eff}}$ , the effective sample size taking into account the multiple rounds of binomial sampling inherent to a pool-seq design (Kolaczkowski et al., 2011; Feder, Petrov, & Bergland, 2012).

204 Chains were assessed for convergence with the “coda” R package (v. 0.19-1; Plummer, Best, Cowles, & Vines, 2006). Convergence was good across the four chains for most analyses and parameters (potential scale reduction factors (PSRFs) of  $\sim 1$  in a Gelman-Rubin diagnostic test; 207 figures S4-S7), except for analyses of autosomal SNPs and PC2 as the environmental variable which showed mild convergence problems (PSRF = 1.71), although parameter estimates agreed well with the other chains. Thus, this first chain was discounted for all analyses and only estimates 210 from the remaining 3 chains were used. The union of significant SNPs (q-value for the g parameter  $< 0.05$ ) across these chains were taken as the final candidate SNPs.

Finally, population genetic statistics ( $\pi$ , and Tajima’s D) were computed in windows of 10kb 213 with a step size of 5kb using methods implemented for pool-seq data (Kapun et al., 2019). These statistics were only computed for scaffolds with a length  $> 10\text{kb}$ .  $F_{\text{st}}$  was computed for each population with the R package “poolfstat” (v. 1.1.1; Hivert, Leblois, Petit, Gautier, & Vitalis, 2018) 216 by first computing all pairwise values, and then deriving population specific  $F_{\text{st}}$  values by averaging across all pairwise values where a population was included. See the supplementary material for pseudocode commands of the key pipeline steps.

219

## RESULTS

### Cold tolerance measures, bioclimatic variables and population geography

222 Across individuals, there was no evidence of an association between minimum critical temperature (CTmin) and the chill coma recovery time (CCRT;  $\text{cor} = 0.08$ ,  $p = 0.07$ ). CTmin and CCRT varied among populations according to sex, population and/or latitude. CTmin was

225 significantly different between sexes ( $X^2 = 10.1$ , d.f. = 1,  $p = 0.002$ ) as well as among populations  
( $X^2 = 51.4$ , d.f. = 5,  $p < 0.001$ ) but there was no evidence for an interaction ( $X^2 = 4.8$ , d.f. = 5,  $p =$   
0.44; see also figure 2A). Similarly, CTmin covaried significantly with latitude ( $X^2 = 7.9$ , d.f. = 1,  $p =$   
228 = 0.005) and sex ( $X^2 = 11.3$ , d.f. = 1,  $p < 0.001$ ), but there was no significant interaction effect  
between latitude and sex ( $X^2 = 0.47$ , d.f. = 1,  $p = 0.49$ ). For CCRT there was no effect of sex ( $X^2 =$   
1.6, d.f. = 1,  $p = 0.2$ ) but it varied significantly among populations ( $X^2 = 18.5$ , d.f. = 5,  $p = 0.002$ ;  
231 figure 2C) and, despite the striking difference between males and females in the Seward population  
(figure 2C), there was no evidence for a significant interaction effect between population and sex  
( $X^2 = 4.38$ , d.f. = 5,  $p = 0.5$ ). Similarly, only latitude had a significant effect on CCRT ( $X^2 = 16.9$ ,  
234 d.f. = 1,  $p < 0.001$ ). As one would expect, CTmin showed on average lower values (figure 2B), and  
CCRT times were shorter (figure 2D), at higher latitudes, meaning that more northern populations  
show higher cold tolerance. The final models for CTmin and CCRT are given in the supplementary  
237 material.

We performed Principal Component Analysis (PCA) of the WorldClim climate data for a  
total of 24 *D. montana* populations, from which we had collected samples and where climate data  
240 were available. This enabled us to ensure that the populations, which we had chosen for the cold  
tolerance tests and genome sequencing, represented the whole scale of environmental variation  
experienced by the species. These analyses identified four Principal Components (PCs) that  
243 together explained about 98% of the variation (figure 3A and B). The first two PCs separated the  
populations roughly by a measure of “distance inland” (PC1) and then by latitude (or altitude)  
(PC2). PC1 explained ~55% of the variation (figure 3C and D) and loaded heavily on climate and  
246 biological variables associated with precipitation and temperature such as “Mean Temperature of  
Coldest Quarter”, “Precipitation of Wettest Month”, “Annual Precipitation”. Meanwhile, PC2  
explained about 23% of the variation and loaded heavily on biological variables that are associated  
249 with latitudinal clinality, e.g. “Mean Diurnal [Temperature] Range,” and “Isothermality” which is  
the diurnal range divided by the mean “Annual [Temperature] Range”. The remaining PCs (PC3  
and PC4) explained about 11.5 and 5% of the variation respectively and did not capture as much of  
252 the climatic variation. Neither latitude (Spearman’s Rank Correlation:  $\rho = -0.50$ ,  $p = 0.02$ ) nor  
altitude ( $\rho = -0.37$ ,  $p = 0.12$ ) correlated significantly with PC1. However, both altitude ( $\rho = -$   
0.56,  $p = 0.01$ ) and latitude ( $\rho = -0.59$ ,  $p = 0.003$ ) correlated with PC2 (see also figure 3).  
255 Importantly, all these patterns also hold if PCA is performed using only the 6 populations for which  
genomic data were collected. Thus, any relationship between environmental variables and genetic  
differentiation in the samples selected for pool-seq is likely to reflect true patterns across  
258 populations of *D. montana*. To examine the association between climate and phenotype, we  
compared these across the six populations. CTmin was positively correlated with PC1 (correlation



coefficient (cor) = 0.94,  $p < 0.01$ ) and with PC2 (cor = 0.75,  $p = 0.09$ ). However, CCRT showed no  
261 relationship with either PC1 (cor = 0.1,  $p = 0.85$ ) or PC2 (cor = -0.45,  $p = 0.37$ ) although the small  
sample sizes ( $N = 6$  in all cases) makes reliable conclusions difficult.

## 264 Genomics

The number of SNPs with a significant association between overall  $F_{st}$ , the two cold  
tolerance measures, and the two PCs of the bioclimatic data varied from 612 and 2,480 (table 2).  
267 Using PC1 as an environmental variable with BayeScEnv gave a total of 2,976 and 1,528 SNPs  
with a q-value  $< 0.05$  on the autosomes and on the X chromosome respectively. Interestingly, the  
distribution across the chromosomes was not random as, by using the distribution of all SNPs as the  
270 expected distribution, there was a significant deviation from expectation ( $X^2 = 2,906.4$ , d.f. = 4,  $p <$   
 $0.001$ ). There were many more SNPs than expected on chromosome 4 (1,432 vs. 954) and on the X  
chromosome (1528 vs. 526). Results were similar for PC2 with 6,607 and 1,861 SNPs with a q-  
273 value  $< 0.05$  on the autosomes and X chromosomes, respectively. Again, there was a significant  
deviation from the expected distribution of SNPs across the chromosomes ( $X^2 = 1,681.9$ , d.f. = 4,  $p$   
 $< 0.001$ ) with an overrepresentation on the 4<sup>th</sup> (2,480 vs. 1,794) and the X chromosomes (1,861 vs.  
276 989).

We also used average CTmin values per population in similar analyses and found a total of  
2,668 and 1,272 SNPs with a q-value  $< 0.05$  on the autosomes and X chromosomes, respectively.  
279 The pattern of significant deviations from expected distributions ( $X^2 = 2,526.2$ , d.f. = 4,  $p < 0.001$ )  
was also due to an excess on the 4<sup>th</sup> (1,383/835) and the X chromosomes (1,272/460). Similar  
results were found for CCRT with a total of 2,240 and 1,228 SNPs with a q-value  $< 0.05$ ,  
282 respectively. Once again, there was a significant deviation from the expected distribution of SNPs  
( $X^2 = 2,825.6$ , d.f. = 3,  $p < 0.001$ ) with and excess on the 4<sup>th</sup> (1,252/735) and the X chromosomes  
(1,228/405).

To examine the loci implicated in the four BayScEnv analyses, we identified genes  
285 containing or nearby (within 10kb) the candidate SNPs (table S3). The second largest set are those  
genes unique to the analysis of PC2 as an environmental covariate (figure 4). However, overall  
288 there is substantial overlap among these genes with ~39% (1,102 in total) of them being shared by  
all the four analyses (table S3, figure 4). Some (147, ~13%) of these common genes are novel to *D.*  
*montana* (i.e. not annotated in *D. virilis* or other *Drosophila* spp.) and therefore have no annotation,  
291 but 955 have an identifiable *D. virilis* ortholog (table S3). Functional enrichment analyses revealed  
several common categories of genes associated with the climatic variables and population  
phenotypes (table 3, all categories are given in table S4). For example, terms associated with  
294 membrane and transmembrane structures, immunoglobulins, HAD hydrolase and nucleotide

binding were enriched in most of the variables (table 3). Interestingly, there were also several gene ontology categories that were only enriched in one of the variables, like glycoside and ATPase  
297 hydrolase in CCRT and ion channels and transport, as well as metal binding in PC1 (table 3, table S4).

We then compared these loci with genes implicated in previous studies of climatic  
300 adaptation in *D. montana* including gene expression studies of traits connected to diapause and cold-tolerance (Kankare et al., 2010; 2016; Parker et al., 2015; 2016). Additionally, several outlier genes have been identified near the most significantly differentiated SNPs among *D. montana*  
303 populations from Oulanka (Finland), and from North American populations in Colorado and Vancouver (Parker et al., 2018). Finally, experimental selection experiments identified several genes near SNPs responding to selection from changes to the photoperiod (Kauranen et al., 2019). We  
306 tested for an overlap between the total set of genes within 10kb of outlier SNPs from all of the BayScEnv runs (N = 2,694) and the candidate gene sets identified in earlier studies (see table S5 for the gene sets and studies used). We computed a bootstrap distribution of overlaps by sampling 2,694  
309 random genes from the *D. montana* annotation. For each gene set this was done 100 times and the distribution compared to the empirical overlap. Results are given in figure S8. In all the cases the empirical overlap was greater than expected by chance. The only gene that was found in all five of  
312 the previous studies used and in the comparison here is called *sidestep II* (*side-II*; table S6). Unfortunately, there is no information available about the biological processes or molecular functions connected to it. Moreover, from 44 other genes that were common to four of our previous  
315 studies and this study (table S6) most (27) have an ortholog in *D. melanogaster*. These genes have molecular functions such as transmembrane signaling or transporter, acetylcholinesterase, ATP binding, protein serine/threonine kinase, carboxylic ester hydrolase, or Rho guanyl-nucleotide  
318 exchange factor activity (Thurmond et al., 2019). Many of the genes are also connected to metal ion, nucleid acid or zinc ion binding (table S6). After identifying information on molecular or biological function and Interpro domains, eventually only five genes remained for which there was  
321 no information available (table S6).

Finally, examination of population genetic parameters identified the Crested Butte population as anomalous. The distribution of Tajima's D is centered close to zero in most  
324 populations, being slightly more negative in North American populations (figure S9). However, Crested Butte is an outlier with a greatly reduced genome-wide Tajima's D (figure S9). Similarly, diversity ( $\pi$ ) is also lower in this population than in other populations. There is no overall  
327 relationship between latitude and  $\pi$  (Spearman's rho = 0.14, N = 6, p = 0.8; figure S9) but there is a strong correlation between latitude and Tajima's D which is influenced by this population (with Crested Butte: rho = 0.88, N = 6, p = 0.03; without Crested Butte: rho = 0.8, N = 5, p = 0.13).

330 Although Crested Butte occurs at a much higher altitude (>2800 meters) than other populations  
neither Tajima's  $D$  nor  $\pi$  correlated significantly with altitude (Tajima's  $D$ :  $\rho = -0.6$ ,  $N = 6$ ,  $p =$   
0.24,  $\pi$ :  $\rho = -0.6$ ,  $N = 6$ ,  $p = 0.24$ ). Furthermore,  $F_{st}$  was similar across all populations and  
333 chromosomes with the exception of Crested Butte which remained an outlier with unusually high  $F_{st}$   
(table 4). Finally,  $F_{st}$  was always highest on chromosome 4 and the X chromosome, complementing  
the results seen in BayeScEnv analyses (table 4 *c.f.* table 2) and as expected if this ecological  
336 selection is influencing genomic divergence.

## DISCUSSION

339 Detecting genomic signatures of climatic adaptation is an important, but challenging task.  
Here we use multiple sources of evidence to study ecological adaptation and population divergence  
in a highly cold tolerant species of *Drosophila*, *D. montana*. This species is characterised by a wide  
342 circumpolar distribution extending to high latitudes both in North America and Europe, and to high  
altitudes in the southern part of its range in the Rocky Mountains of North America. These habitats  
impose extreme seasonal and climatic selective pressure. In this study, we collected bio-climatic  
345 data from 24 populations along a latitudinal gradient of about 2,900 km in North America, and six  
populations from a gradient of 720 km in Finland. We then characterised population level cold-  
tolerance for six populations from these clines using two commonly used cold tolerance methods,  
348 critical thermal minimum (CTmin) and chill coma recovery time (CCRT). We also performed pool-  
seq of six of these populations to investigate the association between genomic and environmental  
differentiation across different populations.

351 In our study, two methods examining cold tolerance gave somewhat different results, as  
CTmin, but not CCRT, differed significantly between sexes, with females having lower CTmin  
values than males, on average. Similarly, in an earlier study investigating seasonal changes in *D.*  
354 *montana* CCRTs, only one out of six comparisons showed a significant difference between sexes  
(Vesala, Salminen, Kostal, Zahradnickova, & Hoikkala, 2012) and Gibert, Moreteau, Petavy, Karan  
& David (2001) did not detect sex-specific differences in CCRT in any of 84 *Drosophila* species  
357 they studied. However, several studies of *D. melanogaster* have detected shorter CCRT in females  
than in males, suggesting that females are more cold tolerant than males (David et al., 1998;  
Andersen et al., 2015; Bauerfeind, Kellermann, Moghadam, Loeschcke, & Fischer, 2014) which  
360 could be related to their greater body mass (e.g. Wilder et al., 2010). Consequently, the extent and  
adaptive significance of sex-specific differences in CCRT in *Drosophila* remains unclear. Overall,  
regardless of the sex, CTmin were lower and CCRT times shorter in higher latitude populations as  
363 one would expect, indicating that more northern populations are more cold-tolerant.

We then derived principal components to summarise WorldClim climatic variables using data from all the 24 populations of *D. montana* spanning two continents. The first principal component (PC1) separated populations roughly by a measure of “distance inland” and loaded heavily on climate and variables associated with precipitation and temperature. These results follow the geographic distribution of the populations, for example, the population with highest values for PC1 is Ashford, which is a population on the Pacific coast and receives most rain, but also experiences warm summers and mild winters. Meanwhile, principal component 2 (PC2), loaded heavily on bioclimatic variables associated with latitudinal clinality, which also mapped onto location of the populations intuitively as populations with higher values on PC2 also occurred at higher latitudes. Interestingly, CTmin values were positively correlated with PC1, but not with PC2, while CCRT showed no relationship with either of these components. This suggests that CTmin and CCRT measure at least slightly different biochemical or physiological mechanisms as e.g. MacMillan, Williams, Staples, & Sinclair, 2012 and Findsen, Pedersen, Petersen, Nielsen & Overgaard (2013) have suggested, and could hence be correlated with different climatic variables. Indeed across the individuals measured here these two traits are also uncorrelated, and the correlation between these two measures has often been found to be relatively weak in other studies (Andersen et al., 2015).

The Bayesian analysis identified SNPs showing an association of genetic differentiation with climatic and phenotypic variation. The extent to which the loci underlying the phenotypes and adaptations to different climatic conditions are shared indicates that these are closely associated in driving genome evolution. We found that genes near SNPs showing a significant association between genetic and climatic differentiation overlapped to a large extent with genes near SNPs showing a significant association between genetic and phenotypic differentiation among populations. The largest intersection set, containing 1,102 genes, was the one containing genes near SNPs associated with all the four variables examined (PC1, PC2, CTmin and CCRT). However, PC2 loads heavily on bioclimatic variables relating to latitude, and our analysis using PC2 as a covariate has a large number of private genes (see figure 4), suggesting that there is also a substantial amount of genetic variation underlying adaptations to latitude unrelated to the phenotypic measures we have quantified. Our study is an excellent example of how strong ecological selection may be detected in genomic studies. In particular, because Bayesian methods examining both ecological variables and relevant phenotypes gives significant overlap amongst the associated loci, and that these are further associated with more broad genomic differentiation between populations, gives confidence that we are consistently identifying genes associated with ecological selection.

Analyses of the functional annotation of these genes strengthens our conclusions that  
399 climate driven adaptation is important. Regions near SNPs significantly associated with climatic  
variables were enriched for genes previously identified as candidates related to cold tolerance,  
diapause and responses to changes in day length in *D. montana* (Kankare et al., 2010; 2016; Parker  
402 et al., 2015; 2016). Thus, genetic variation across populations of these flies may be largely shaped  
by differences in ecological and climatic variation. This ecological specialisation may have also  
contributed to the divergence of *D. montana* from its relatives. Parker et al., (2018) surveyed the  
405 rates of molecular evolution in eleven cold tolerant and non-cold tolerant species of *Drosophila*.  
The genes found to be evolving at faster rates in cold-tolerant species were enriched for many of the  
same functional categories as in our current study including e.g. membrane and transmembrane  
408 proteins and immunoglobulins (Parker et al., 2018).

Membrane proteins and lipids are an important determinant of membrane and cuticular  
permeability at different temperatures, which in turn has an effect on the resistance to desiccation  
411 stress in insects (Gibbs, 2002; Stanziano, Sové, Rundle, & Sinclair, 2015). Importantly, there is  
evidence for a close link between the desiccation stress response and cold tolerance across species  
and in *Drosophila* in particular, suggesting an overlap in some of the mechanisms involved  
414 (Sinclair, Nelson, Nilson, Roberts, & Gibbs, 2007). Moreover, cold-hardy lines of *D. melanogaster*  
are known to exhibit elevated lipid metabolism, perhaps in order to allow rapid lipid membrane  
modification (Williams et al., 2016) in different environmental conditions. Furthermore, Pleckstrin  
417 homology (PH) domain was one of the functional clusters found in both the current study and in the  
species comparison of Parker et al., (2018). This domain is a flexible module of 100-120 amino  
acids which interacts with a variety of different ligands, composing a protein-protein interaction  
420 platform (Scheffzek & Welte, 2012). As changes in the membrane lipid biochemistry form an  
integral part of the cold tolerance response, genes associated with PH may also assist in  
homeoviscous adaptation i.e. alteration of membrane phospholipid composition to maintain its  
423 fluidity at the low temperatures (Sinensky, 1974). Interestingly, the only gene found in all five of  
our previous studies of cold tolerance and other phenotypes related to it in *D. montana* was *sidestep*  
*II* (*side-II*). Unfortunately, there is no information available for the biological processes or  
426 molecular functions associated with this gene but *side-II* has protein features including  
immunoglobulin and immunoglobulin-like domain superfamily (Thurmond et al., 2019) and could  
hence be involved in the immunological processes during cold response of the flies.  
429 Immunoglobulins were also one of the functional clusters enriched among rapidly evolving genes in  
cold-tolerant species Parker et al. (2018). Insects are known to produce a diverse range of  
antimicrobial peptides and proteins as part of their immune activity against viruses, bacteria, fungi  
432 and parasites (Mylonakis, Podsiadlowski, Muhammed, & Vilcinskas, 2016) and hence immune

responses could be part of the general stress response in cold tolerance (Sinclair, Ferguson, Salehipour-shirazi, & MacMillan, 2013; Ferguson, Heinrichs, & Sinclair, 2016). Consequently, our  
435 results indicate that some of the same biochemical processes that are targeted by selection on larger  
evolutionary scales (i.e. across species), are also involved in local adaptation for different  
populations within a species, providing a rare bridge between the processes of population  
438 differentiation and speciation.

At the chromosomal level, we found an over-representation of loci associated with  
ecological selection on chromosomes X and 4. It is well-known that X chromosomes can generally  
441 evolve quickly due to selection on semi-recessive advantageous loci in the hemizygous sex, and  
smaller effective population size (Charlesworth, Coyne, & Barton, 1987) and are often most  
divergent between closely related species (Abbott, Norden, & Hansson, 2017; Ellegren et al., 2012).  
444 However, there is no obvious reason to expect faster divergence in chromosome 4. Both the X  
chromosome and chromosome 4 of *D. montana* are known to harbour several polymorphic  
inversions (Stone, Guest, & Wilson, 1960; Morales-Hojas, Päällysaho, Vieira, Hoikkala, & Vieira,  
447 2007) and inversions have often been found to vary clinally and to contribute to genomic  
differentiation throughout clines (e.g. Kolaczowski et al., 2011; Cheng et al., 2012; Kapun et al.,  
2016). The reduced recombination within inversions can capture independently advantageous  
450 alleles under selection (Kirkpatrick & Barton, 2006). Divergence is often greater in chromosomes  
carrying inverted regions and non-colinear regions (Lohse, Clarke, Ritchie, & Etges, 2015) and  
such regions may diverge more quickly during speciation with gene flow. Indeed, here we found  
453 that the X chromosome and chromosome 4 always have the highest levels of  $F_{st}$  across all  
populations, as expected if the ecological selection on loci on these chromosomes influenced overall  
patterns of genomic diversion, perhaps due to hitchhiking. Given these findings, further investigation  
456 of the known inversion polymorphisms in across *D. montana* populations would be very interesting.  
Finally, our findings include intriguing result regarding the Crested Butte population which shows  
reduced genetic variability and a substantial reduction of Tajima's D relative to the other  
459 populations. This population occurs at a very high altitude (>2800 m) and also shows reproductive  
incompatibilities with other populations (Jennings et al., 2014). It may have been bottlenecked  
during its adaptation to this high altitude, so population expansion or selected sweeps could be  
462 prevalent within this population. Whether ecological specialisation is associated with the spread of  
incompatibilities is an intriguing possibility.

## 465 CONCLUSION

Identifying the genetic variation that underlies population divergence and ultimately  
speciation remains a challenge. Detecting associations between genetic and environmental



468 differentiation at loci across populations has become a popular approach. Here we apply Bayesian  
methods to detect such loci across populations of *Drosophila montana*, which is an extraordinarily  
cold-tolerant *Drosophila* species where we expect strong ecological selection. We identify many  
471 genes that are associated with both climate variables and population-level cold-tolerance  
phenotypes. These genes also overlap with candidate genes from other studies of variation in cold-  
tolerance in *D. montana*. Our study presents an excellent example of how strong ecological  
474 selection can be detected in genome studies, using Bayesian methods to detect local adaptation in  
combination with studies of ecologically important phenotypes.

#### 477 **Data Availability**

Raw reads have been deposited with NCBI under the BioProject accession PRJNA588720.

#### 480 **Acknowledgments**

This work was supported by a combined Natural Environment Research Council and St  
Andrews 600th Anniversary PhD Studentship grant (NE/L501852/1) to RAWW, The Ella and  
483 Georg Ehrnrooth Fellowship to VT, NERC grant NE/P000592/1 to MGR, and Academy of Finland  
project 267244 to AH and projects 268214 and 322980 to MK. Bioinformatics and Computational  
Biology analyses were supported by the University of St Andrews Bioinformatics Unit which is  
486 funded by a Wellcome Trust ISSF award (grant 105621/Z/14/Z).

#### **REFERENCES**

- 489 Abbott, J. K., Norden, A. K., & Hansson, B. (2017). Sex chromosome evolution: Historical insights  
and future perspectives. *Proceedings of the Royal Society B: Biological Sciences*, 284.  
doi: 10.1098/rspb.2016.2806
- 492 Andersen, J. L., Manenti, T., Sorensen, J. G., MacMillan, H. A., Loeschcke, V., & Overgaard, J.  
(2015). How to assess *Drosophila* cold tolerance: Chill coma temperature and lower lethal  
temperature are the best predictors of cold distribution limits. *Functional Ecology*, 29, 55–65.  
495 doi: 10.1111/1365-2435.12310
- Andrews, S. (2015). FastQC: A quality control tool for high throughput sequence data. Retrieved  
from <http://www.bioinformatics.bbsrc.ac.uk/projects/fastqc/>
- 498 Barnett, D. W., Garrison, E. K., Quinlan, A. R., Strömberg, M. P., & Marth, G. T. (2011). Bamtools:  
A C++ API and toolkit for analyzing and managing BAM files. *Bioinformatics*, 27, 1691–  
1692. doi: 10.1093/bioinformatics/btr174
- 501 Barton, N. H., & Gale, K. S. (1993). Genetic analysis of hybrid zones. In R. G. Harrison (Ed.),  
*Hybrid Zones and the Evolutionary Process*. (pp. 13–45). Oxford, UK: Oxford University Press.

- Bates, D., Mächler, M., Bolker, B., & Walker, S. (2015). Fitting Linear Mixed-Effects Models Using lme4. *Journal of Statistical Software*, *67*, 1–48. doi: 10.18637/jss.v067.i01
- 504
- Bauerfeind, S. S., Kellermann, V., Moghadam, N. N., Loeschcke, V., & Fischer, K. (2014). Temperature and photoperiod affect stress resistance traits in *Drosophila melanogaster*. *Physiological Entomology*, *39*, 237–246. doi: 10.1111/phen.12068
- 507
- Bergland, A. O., Behrman, E. L., O’Brien, K. R., Schmidt, P. S., & Petrov, D. (2014). Genomic evidence of rapid and stable adaptive oscillations over seasonal time scales in *Drosophila*. *PLoS Genetics*, *10*, e1004775. doi: 10.1371/journal.pgen.1004775
- 510
- Bolger, A. M., Lohse, M., & Usadel, B. (2014). Trimmomatic: A flexible trimmer for Illumina sequence data. *Bioinformatics*, *30*, 2114–2120. doi: 10.1093/bioinformatics/btu170
- 513
- Bradbury, D., Smithson, A., & Krauss, S. L. (2013). Signatures of diversifying selection at EST-SSR loci and association with climate in natural *Eucalyptus* populations. *Molecular Ecology*, *22*, 5112–5129. doi: 10.1111/mec.12463
- 516
- Broad Institute. Picard. Retrieved from <http://broadinstitute.github.io/picard/>
- Carneiro, M., Baird, S. J. E., Afonso, S., Ramirez, E., Tarroso, P., Teotónio, H., ... Ferrand, N. (2013). Steep clines within a highly permeable genome across a hybrid zone between two subspecies of the European rabbit. *Molecular Ecology*, *22*, 2511–2525. doi: 10.1111/mec.12272
- 519
- Charlesworth, B., Coyne, J. A., & Barton, N. H. (1987). The relative rates of evolution of sex chromosomes and autosomes. *The American Naturalist*, *130*, 113–146.
- 522
- Chen, J., Källman, T., Ma, X., Gyllenstrand, N., Zaina, G., Morgante, M., ... Lascoux, M. (2012). Disentangling the roles of history and local selection in shaping clinal variation of allele frequencies and gene expression in Norway spruce (*Picea abies*). *Genetics*, *191*, 865–881. doi: 10.1534/genetics.112.140749
- 525
- Cruickshank, T. E., & Hahn, M. W. (2014). Reanalysis suggests that genomic islands of speciation are due to reduced diversity, not reduced gene flow. *Molecular Ecology*, *23*, 3133–3157. doi: 10.1111/mec.12796
- 528
- David, R., Gibert, P., Pla, E., Petavy, G., Karan, D., & Moreteau, B. (1998). Cold stress tolerance in *Drosophila*: Analysis of chill coma recovery in *D. melanogaster*. *Journal of Thermal Biology*, *23*, 291–299. doi: 10.1016/S0306-4565(98)00020-5
- 531
- Ellegren, H., Smeds, L., Burri, R., Olason, P. I., Backstrom, N., Kawakami, T., ... Wolf, J. B. W. (2012). The genomic landscape of species divergence in *Ficedula* flycatchers. *Nature*, *491*, 756–760. doi: 10.1038/nature11584
- 534
- Endler, J. A. (1973). Gene flow and differentiation. *Science*, *179*, 243–250. doi: 10.1126/science.179.4070.243

- 537 Endler, J. A. (1977). *Geographic Variation, Speciation, and Clines*. Princeton, NJ: Princeton University Press.
- Feder, A. F., Petrov, D. A., & Bergland, A. O. (2012). LDx: Estimation of linkage disequilibrium  
540 from high-throughput pooled resequencing data. *PLoS ONE*, 7. doi: 10.1371/journal.pone.0048588
- Ferguson, L. V., Heinrichs, D. E., & Sinclair, B. J. (2016). Paradoxical acclimation responses in the  
543 thermal performance of insect immunity. *Oecologia*, 181, 77–85. doi: 10.1007/s00442-015-3529-6
- Findsen, A., Andersen, J. L., Calderon, S., & Overgaard, J. (2013). Rapid cold hardening improves  
546 recovery of ion homeostasis and chill coma recovery time in the migratory locust, *Locusta migratoria*. *Journal of Experimental Biology*, 216, 1630–1637. doi: 10.1242/jeb.081141
- Findsen, A., Pedersen, T. H., Petersen, A. G., Nielsen, O. B., & Overgaard, J. (2014). Why do  
549 insects enter and recover from chill coma? Low temperature and high extracellular potassium compromise muscle function in *Locusta migratoria*. *The Journal of experimental biology*, 217, 1297–1306. doi: 10.1242/jeb.098442
- 552 Foll, M., & Gaggiotti, O. E. (2008). A genome-scan method to identify selected loci appropriate for both dominant and codominant markers: A Bayesian perspective. *Genetics*, 180, 977–993. doi: 10.1534/genetics.108.092221
- 555 Foll, M., Gaggiotti, O. E., Daub, J. T., Vatsiou, A., & Excoffier, L. (2014). Widespread signals of convergent adaptation to high altitude in Asia and America. *American Journal of Human Genetics*, 95, 394–407. doi: 10.1016/j.ajhg.2014.09.002
- 558 Gautier, M. (2015). Genome-wide scan for adaptive divergence and association with population-specific covariates. *Genetics*, 201, 1555–1579. doi: 10.1534/genetics.115.181453
- Gibbs, A. G. (2002). Lipid melting points and cuticular permeability: New insights into an old  
561 problem. *Journal of Insect Physiology*, 48, 391–400. doi: 10.1016/s0022-1910(02)00059-8
- Gibert, P., Moreteau, B., Petavy, G., Karan, D., & David, J. (2001). Chill-coma tolerance, a major climatic adaptation among *Drosophila* species. *Evolution*, 55, 1063–1068. doi: 10.1554/0014-  
564 3820(2001)055[1063:cctamc]2.0.co;2
- Hijmans, R. J., Cameron, S. E., Parra, J. L., Jones, P. G., & Jarvis, A. (2005). Very high resolution interpolated climate surfaces for global land areas. *International Journal of Climatology*, 25, 1965–1978. doi: 10.1002/joc.1276
- 567 Hijmans, R. E., van Etten, J., Cheng, J., Mattiuzzi, M., Sumner, M., Greenberg, J. A., ... Wueest, R. (2016). raster: Geographic Data Analysis and Modeling. Retrieved from: <https://CRAN.R-project.org/package=raster>
- 570

- Hivert, V., Leblois, R., Petit, E. J., Gautier, M., & Vitalis, R. (2018). Measuring genetic differentiation from pool-seq data. *Genetics*, *210*, 315–330. doi: 10.1534/genetics.118.300900
- 573 Hoekstra, H., Drumm, K., & Nachman, M. (2004). Ecological genetics of adaptive color polymorphism in pocket mice: Geographic variation in selected and neutral genes. *Evolution*, *58*, 1329–1341. doi: 10.1111/j.0014-3820.2004.tb01711.x
- 576 Jennings, J. H., Mazzi, D., Ritchie, M. G., & Hoikkala, A. (2011). Sexual and postmating reproductive isolation between allopatric *Drosophila montana* populations suggest speciation potential. *BMC Evolutionary Biology*, *11*. doi: 10.1186/1471-2148-11-68
- 579 Jennings, J. H., Snook, R. R., & Hoikkala, A. (2014). Reproductive isolation among allopatric *Drosophila montana* populations. *Evolution*, *68*, 3095–3108. doi: 10.1111/evo.12535
- 582 Kankare, M., Salminen, T., Laiho, A., Vesala, L., & Hoikkala, A. (2010). Changes in gene expression linked with adult reproductive diapause in a northern malt fly species: A candidate gene microarray study. *BMC Ecology*, *10*. doi: 10.1186/1472-6785-10-3
- 585 Kankare, M., Parker, D. J., Merisalo, M., Salminen, T. S., & Hoikkala, A. (2016). Transcriptional differences between diapausing and non-diapausing *D. montana* females reared under the same photoperiod and temperature. *PLoS ONE*, *11*, e0161852. doi: 10.1371/journal.pone.0161852
- 588 Kapun, M., Fabian, D.K., Goudet, J., & Flatt, T. (2016). Genomic evidence for adaptive inversion clines in *Drosophila melanogaster*. *Molecular Biology and Evolution*, *33*, 1317–1336. doi: 10.1093/molbev/msw016
- 591 Kapun, M., Barrón, M. G., Staubach, F., Vieira, J., Obbard, D. J., Goubert, C., ... González, J. (2019). Genomic analysis of European *Drosophila melanogaster* populations on a dense spatial scale reveals longitudinal population structure and continent-wide selection, and unknown DNA viruses. *BioRxiv*. doi: 10.1101/313759
- 594 Kauranen, H., Kinnunen, J., Hiillos, A-L., Lankinen, P., Hopkins, D., Wiberg, R. A. W., ... Hoikkala, A. (2019). Selection for reproduction under short photoperiods changes diapause-associated traits and induces widespread genomic divergence. *Journal of Experimental Biology*, *222*, jeb205831. doi: 10.1242/jeb.205831
- 600 Kellermann, V., Overgaard, J., Hoffmann, A. A., Flojgaard, C., Svenning, J. C., & Loeschcke, V. (2012). Upper thermal limits of *Drosophila* are linked to species distributions and strongly constrained phylogenetically. *Proceedings of the National Academy of Sciences of the United States of America*, *109*, 16228–16233. doi: 10.1073/pnas.1207553109
- 603 Kirkpatrick, M., & Barton, N. (2006). Chromosome inversions, local adaptation and speciation. *Genetics*, *173*, 419–434. doi: 10.1534/genetics.105.047985

- Klappert, K., Mazzi, D., Hoikkala, A., & Ritchie, M. G. (2007). Male courtship song and female preference variation between phylogeographically distinct populations of *Drosophila montana*. *Evolution*, *61*, 1481–1488. doi: 10.1111/j.1558-5646.2007.00125.x
- 606
- Kolaczkowski, B., Kern, A. D., Holloway, A. K., & Begun, D. J. (2011). Genomic differentiation between temperate and tropical Australian populations of *Drosophila melanogaster*. *Genetics*, *187*, 245–260. doi: 10.1534/genetics.110.123059
- 609
- Lakovaara, S. (1969). Malt as a culture medium for *Drosophila* species. *Drosophila Information Service*, *44*, 128.
- Lankinen, P., Tyukmaeva, V. I., & Hoikkala, A. (2013). Northern *Drosophila montana* flies show variation both within and between cline populations in the critical day length evoking reproductive diapause. *Journal of Insect Physiology*, *59*, 745–751. doi: 10.1016/j.jinsphys.2013.05.006
- 612
- 615
- Lê, S., Josse, J., & Husson, F. (2008). FactoMineR: An R package for multivariate analysis. *Journal of Statistical Software*, *25*, 1–18. doi: 10.18637/jss.v025.i01
- Li, H. (2013). Aligning sequence reads, clone sequences and assembly contigs with BWA-MEM. arXiv:1303.3997v1 [q-bio.GN] Retrieved from: <https://arxiv.org/abs/1303.3997>
- 618
- Li, H., Handsaker, B., Wysoker, A., Fennell, T., Ruan, J., Homer, N., ... The 1000 Genome Project Data Processing Subgroup. (2009). The Sequence Alignment/Map format and SAMtools. *Bioinformatics*, *25*, 2078–2079. doi: 10.1093/bioinformatics/btp352
- 621
- Lohse, K., Clarke, M., Ritchie, M. G., & Etges, W. J. (2015). Genome-wide tests for introgression between cactophilic *Drosophila* implicate a role of inversions during speciation. *Evolution*, *69*, 1178–1190. doi: 10.1111/evo.12650
- 624
- Machado, H. E., Bergland, A. O., O'Brien, K., Behrman, E. L., Schmidt, P. S., & Petrov, D. (2015). Comparative population genomics of latitudinal variation in *Drosophila simulans* and *Drosophila melanogaster*. *Molecular Ecology*, *25*, 723–740. doi: 10.1111/mec.13446
- 627
- MacMillan, H. A., Williams, C. M., Staples, J. F., & Sinclair, B. J. (2012). Reestablishment of ion homeostasis during chill-coma recovery in the cricket *Gryllus pennsylvanicus*. *Proceedings of the National Academy of Sciences of the United States of America*, *109*, 20750–20755. doi: 10.1073/pnas.1212788109
- 630
- 633
- McKenna, A., Hanna, M., Banks, E., Sivachenko, A., Cibulskis, K., Kernytzky, A., ... DePristo, M. (2010). The Genome Analysis Toolkit: A MapReduce framework for analyzing next-generation DNA sequencing data. *Genome Research*, *20*, 1297–1303. doi: 10.1101/gr.107524.110

- 636 Morales-Hojas, R., Päällysaho, S., Vieira, C. P., Hoikkala, A., & Vieira, J. (2007). Comparative polytene chromosome maps of *D. montana* and *D. virilis*. *Chromosoma*, *116*, 21–7. doi: 10.1007/s00412-006-0075-3
- 639 Mylonakis, E., Podsiadlowski, L., Muhammed, M., & Vilcinskas, A. (2016). Diversity, evolution and medical applications of insect antimicrobial peptides. *Philosophical Transactions of the Royal Society B: Biological Sciences*, *371*, 20150290. doi: 10.1098/rstb.2015.0290
- 642 Noor, M. A. F., & Bennett, S. M. (2009). Islands of speciation or mirages in the desert? Examining the role of restricted recombination in maintaining species. *Heredity*, *103*, 439–444. doi: 10.1038/hdy.2009.151
- 645 Parker, D. J., Vesala, L., Ritchie, M. G., Laiho, A., Hoikkala, A., & Kankare, M. (2015). How consistent are the transcriptome changes associated with cold acclimation in two species of the *Drosophila virilis* group? *Heredity*, *115*, 13–21. doi: 10.1038/hdy.2015.6
- 648 Parker, D. J., Ritchie, M. G., & Kankare, M. (2016). Preparing for Winter: The transcriptomic response associated with different day lengths in *Drosophila montana*. *G3: Genes, Genomes, Genetics*, *6*, 1373–1381. doi: 10.1534/g3.116.027870
- 651 Parker, D. J., Wiberg, R. A. W., Trivedi, U., Tyukmaeva, V. I., Gharbi, K., Butlin, R. K., ... Ritchie, M. G. (2018). Inter- and intra-specific genomic divergence in *Drosophila montana* shows evidence for cold adaptation. *Genome Biology and Evolution*, *10*, 2086–2101. doi: 10.1093/gbe/evy147
- 654 Plummer, M., Best, N., Cowles, K., & Vines, K. (2006). CODA: Convergence diagnosis and output analysis for MCMC. *R News*, *6*, 7–11.
- 657 Paolucci, S., Salis, L., Vermeulen, C. J., Beukeboom, L. W., & van de Zande, L. (2016). QTL analysis of the photoperiodic response and clinal distribution of period alleles in *Nasonia vitripennis*. *Molecular Ecology*, *25*, 4805–4817. doi: 10.1111/mec.13802
- 660 R Development Core Team. (2019). R: A language and environment for statistical computing. Retrieved from <http://www.r-project.org>
- 663 Ravinet, M., Faria, R., Butlin, R. K., Galindo, J., Bierne, N., Rafajlovic, M., ... Westram, A. M. (2017). Interpreting the genomic landscape of speciation: A road map for finding barriers to gene flow. *Journal of Evolutionary Biology*, *30*, 1450–1477. doi: 10.1111/jeb.13047
- 666 Routtu, J., Mazzi, D., van der Linde, K., Mirol, P., Butlin, R., & Ritchie, M. G. (2007). The extent of variation in male song, wing and genital characters among allopatric *Drosophila montana* populations. *Journal of Evolutionary Biology*, *20*, 1591–1601. doi: 10.1111/j.1420-9101.2007.01323.x



- 669 Scheffzek, K., & Welte, S. (2012). Pleckstrin homology (PH) like domains – versatile modules in  
protein–protein interaction platforms. *FEBS Letters*, *586*, 2662–2673. doi:  
10.1016/j.febslet.2012.06.006
- 672 Schlötterer, C., Tobler, R., Kofler, R., & Nolte, V. (2014). Sequencing pools of individuals —  
mining genome-wide polymorphism data without big funding. *Nature Reviews Genetics*, *15*,  
749–763. doi: 10.1038/nrg3803
- 675 Sinclair, B.J., Ferguson, L. V., Salehipour-shirazi, G., & MacMillan, H. A. (2013). Cross-tolerance  
and cross-talk in the cold: Relating low temperatures to desiccation and immune  
stress in insects. *Integrative and Comparative Biology*, *53*, 545–556. doi: 10.1093/icb/ict004
- 678 Sinclair, B. J., Nelson, S., Nilson, T. L., Roberts, S. P., & Gibbs, A. G. (2007). The effect of  
selection for desiccation resistance on cold tolerance of *Drosophila melanogaster*. *Physiological  
Entomology*, *32*, 322–327. doi: 10.1111/j.1365-3032.2007.00585.x
- 681 Sinensky, M. (1974). Homeoviscous adaptation—A homeostatic process that regulates the viscosity  
of membrane lipids in *Escherichia coli*. *Proceedings of the National Academy of Sciences of the  
United States of America*, *71*, 522–525. doi: 10.1073/pnas.71.2.522
- 684 Stanziano, J. R., Sové, R. J., Rundle, H. D., & Sinclair, B. J. (2015). Rapid desiccation hardening  
changes the cuticular hydrocarbon profile of *Drosophila melanogaster*. *Comparative  
Biochemistry and Physiology*, *180*, 38–42. doi: 10.1016/j.cbpa.2014
- 687 Stone, W. S., Guest, W. C., & Wilson, F. D. (1960). The evolutionary implications of the cytological  
polymorphism and phylogeny of the *virilis* group of *Drosophila*. *Proceedings of the National  
Academy of Sciences of the United States of America*, *46*, 350–361. doi: 10.1073/pnas.46.3.350
- 690 Takahashi, Y. (2015). Mechanisms and tests for geographic clines in genetic polymorphisms.  
*Population Ecology*. *57*, 355–362.
- Throckmorton, L. H. (1969). The *virilis* Species Group. *The Genetics and Biology of Drosophila*, *3*,  
693 (pp. 227–296).
- Thurmond, J., Goodman, J. L., Strelets, V. B., Attrill, H., Gramates, L. S., Marygold, S. J., ... The  
FlyBase Consortium. (2019). FlyBase 2.0: The next generation. *Nucleic Acids Research*, *47*,  
696 759–765. doi: 10.1093/nar/gky1003
- Tyukmaeva, V. I., Salminen, T. S., Kankare, M., Knott, E. & Hoikkala, A. (2011). Adaptation to a  
seasonally varying environment: A strong latitudinal cline in reproductive diapause combined  
699 with high gene flow in *Drosophila montana*. *Ecology and Evolution*, *1*, 160–168. doi:  
10.1002/ece3.14

- 702 Tyukmaeva, V. I., Lankinen, P., Kinnunen, J., Kauranen, H., & Hoikkala, A. (2020). Latitudinal  
clines in the timing and temperature-sensitivity of photoperiodic reproductive diapause in  
*Drosophila montana*. *Ecography*, *43*, 1–10. doi: 10.1111/ecog.04892
- 705 Vesala, L., & Hoikkala, A. (2011). Effects of photoperiodically induced reproductive diapause and  
cold hardening on the cold tolerance of *Drosophila montana*. *Journal of Insect Physiology*, *57*,  
46–51. doi: 10.1016/j.jinsphys.2010.09.007
- 708 Vesala, L., Salminen, T. S., Kostal, V., Zahradnickova, H., & Hoikkala, A. (2012). *Myo*-inositol as a  
main metabolite in overwintering flies: Seasonal metabolomic profiles and cold stress tolerance  
in a northern drosophilid fly. *Journal of Experimental Biology*, *215*, 2891–2897.  
doi: 10.1242/jeb.069948
- 711 Vesala, L., Salminen, T. S., Laiho, A., Hoikkala, A., & Kankare M. (2012). Cold tolerance and cold-  
induced modulation of gene expression in two *Drosophila virilis* group species with different  
distributions. *Insect Molecular Biology*, *21*, 107–118. doi: 10.1111/j.1365-2583.2011.01119.x
- 714 Vigoder, F. M., Parker, D. J., Cook, N., Tournière, O., Sneddon, T., & Ritchie, M. G. (2016).  
Inducing Cold-Sensitivity in the Frigophilic Fly *Drosophila montana* by RNAi. *PLoS ONE*, *11*,  
1–9. doi: 10.1371/journal.pone.0165724
- 717 Vines, T. H., Dalziel, A. C., Albert, A.Y. K., Veen, T., Schulte, P. M., & Schluter, D. (2016). Cline  
coupling and uncoupling in a stickleback hybrid zone. *Evolution*. *70*, 1023–1038. doi:  
10.1111/evo.12917
- 720 de Villemereuil, P., & Gaggiotti, O. E. (2015). A new FST-based method to uncover local adaptation  
using environmental variables. *Methods in Ecology and Evolution*, *6*, 1248–1258. doi:  
10.1111/2041-210X.12418
- 723 Wilder, S. M., Mayntz, D., Toft, S., Rypstra, A. L., Pilati, A., & Vanni, M. J. (2010). Intraspecific  
variation in prey quality: A comparison of nutrient presence in prey and nutrient extraction by  
predators. *Oikos*, *119*, 350–358. doi: 10.1111/j.1600-0706.2009.17819.x
- 726 Williams, C. M., McCue, M. D., Sunny, N. E., Szejner-Sigal, A., Morgan, T. J., Allison, D. B., &  
Hahn, D. A. (2016). Cold adaptation increases rates of nutrient flow and metabolic plasticity  
during cold exposure in *Drosophila melanogaster*. *Proceedings of the Royal Society B:*  
729 *Biological Sciences*, *283*, 20161317. doi: 10.1098/rspb.2016.1317
- Wolf, J. B. W., & Ellegren, H. (2016). Making sense of genomic islands of differentiation in light of  
speciation. *Nature Reviews Genetics*, *18*, 87–100. doi: 10.1038/nrg.2016.133

732 **Tables, Figures, and Figure Legends**

735 **Table 1.** The sources of population genomic samples (coordinates and the name of the nearest town), altitude of the sampling site, the year in which sampling was performed, and the number of males and females sampled (M/F) for each pool.

| Source                      | Sampling Site                                         | Year | M/F   |
|-----------------------------|-------------------------------------------------------|------|-------|
| USA,<br>Alaska              | Seward<br>60°9'N; 149°27'W<br>Altitude 35 m           | 2013 | 30/20 |
| Canada,<br>British Columbia | Terrace<br>54°27'N; 128°34'W<br>Altitude 217 m        | 2014 | 22/27 |
| USA,<br>Washington          | Ashford,<br>46°45'N; 121°57'W<br>Altitude 573 m       | 2013 | 16/34 |
| USA,<br>Colorado            | Crested Butte<br>38°54'N; 106°57'W<br>Altitude 2900 m | 2013 | 36/13 |
| Finland                     | Oulanka<br>66°40'N; 29°20'E<br>Altitude 337           | 2013 | 25/25 |
| Finland                     | Korpilahti<br>62°20'N; 25°34'E<br>Altitude 133        | 2013 | 27/23 |

741 **Table 2.** Number of SNPs with a q-value < 0.05 on each linkage group (chromosomes) and each environmental variable (see Methods).

| <b>Environmental Variable</b> | <b>LG2</b> | <b>LG3</b> | <b>LG4</b> | <b>LG5</b> | <b>X</b> |
|-------------------------------|------------|------------|------------|------------|----------|
| PC1                           | 561        | 485        | 1,432      | 498        | 1,528    |
| PC2                           | 1,639      | 1,191      | 2,480      | 1,297      | 1,861    |
| CTmin                         | 502        | 399        | 1,383      | 384        | 1,272    |
| CCRT                          | 360        | 312        | 1,252      | 316        | 1,228    |

744 **Table 3.** Functional gene enrichment analyses of the genes within 10kb of candidate SNPs. Table  
 shows if an annotation term was significantly enriched among SNPs for each cold tolerance and  
 climatic variable as well as for the subset of genes in common for all variables (see detailed  
 747 information in table S4).

| <b>CLUSTERS</b>             | <b>All four variables</b> | <b>CCRT</b> | <b>CTmi n</b> | <b>PC 1</b> | <b>PC 2</b> |
|-----------------------------|---------------------------|-------------|---------------|-------------|-------------|
| Membrane                    |                           | X           |               | X           |             |
| Transmembrane               |                           | X           |               | X           |             |
| Immunoglobulins             |                           | X           | X             |             | X           |
| Carbohydrate                |                           | X           |               |             |             |
| Glycoside hydrolase         | X                         | X           |               |             |             |
| HAD hydrolase               | X                         | X           | X             | X           | X           |
| ATPase activity             |                           | X           |               |             |             |
| ABC transport               |                           | X           |               |             |             |
| Phosphate                   |                           | X           | X             |             |             |
| Rho/Pleckstrin/<br>Guanide  |                           |             | X             | X           | X           |
| Nucleotide binding          |                           |             | X             | X           | X           |
| Lipid<br>metabolism/Lipase  |                           |             | X             |             | X           |
| Ion channels &<br>transport |                           |             |               | X           |             |
| SH3 domain                  |                           |             |               | X           |             |
| Cation efflux protein       |                           |             |               | X           |             |
| WD40 repeat                 |                           |             |               | X           |             |
| Metal binding               |                           |             |               | X           |             |

750

753 **Table 4.** Mean (SD)  $F_{st}$  values for each linkage group (chromosome) and population

| <b>Chromosome</b> | <b>Oulanka</b> | <b>Korpilahti</b> | <b>Ashford</b> | <b>Seward</b> | <b>Crested Butte</b> | <b>Terrace</b> |
|-------------------|----------------|-------------------|----------------|---------------|----------------------|----------------|
| <b>LG2</b>        | 0.12           | 0.12              | 0.10           | 0.10          | 0.15                 | 0.11           |
| <b>LG3</b>        | 0.11           | 0.11              | 0.09           | 0.09          | 0.15                 | 0.10           |
| <b>LG4</b>        | 0.15           | 0.15              | 0.14           | 0.13          | 0.19                 | 0.13           |
| <b>LG5</b>        | 0.12           | 0.13              | 0.11           | 0.11          | 0.16                 | 0.11           |
| <b>X</b>          | 0.16           | 0.16              | 0.14           | 0.15          | 0.19                 | 0.14           |



756 **Figure 1.** Maps of **A)** North America and **B)** Finland showing the locations of all populations  
sampled. Labelled, blue circles give the locations of populations sampled for phenotyping and  
sequencing.

759

**Figure 2.** Population phenotypes. **A)** and **B)** give the variation in CTmin across populations and  
latitude respectively. Solid and dashed lines show the predicted values from the best model (see  
762 Results) for males and females respectively. **C)** and **D)** show the variation in CCRT across  
populations and latitude. The trend line in **D)** gives the predicted fits from the best model (see  
Results), although points are plotted separately for males and females, the best model only included  
765 latitude as a covariate.

**Figure 3.** Principle components results. **A)** The distribution of all populations along the two first  
768 PC axes. Blue circles give the populations that have been pool-sequenced for this study, red  
triangles and squares give other North American and Finnish populations respectively. **B)** The  
eigenvalues of all PCs as well as the cumulative variance explained (inset). Dashed horizontal lines  
771 give the thresholds of an eigenvalue of 1 and 98% of variance explained (inset). **C)** and **D)** give  
PCs 1 and 2 as a function of latitude and altitude.

774 **Figure 4.** Overlap of genes within 10kb of top SNPs from BayeScEnv analyses for PC1, PC2  
CTmin, and CCRT. The total set sizes are given by the bars in the bottom left. The overlaps are  
depicted by points connected by lines along the x-axis and the height of the bars indicate the size of  
777 each set.

**Figure 1**

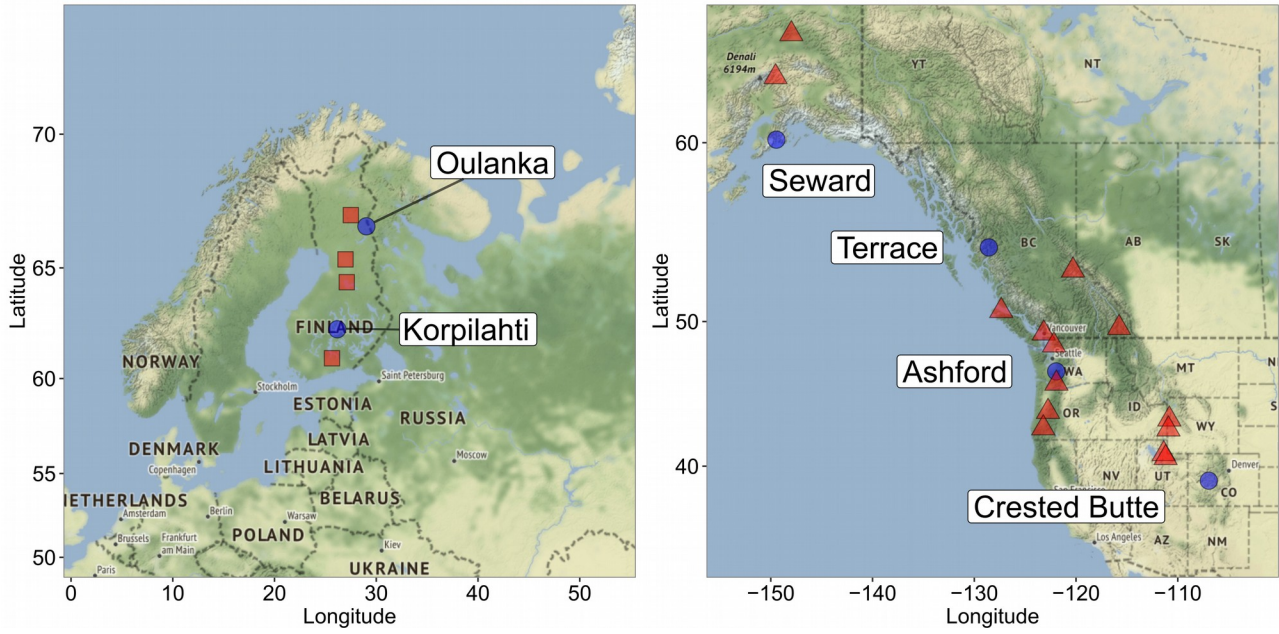

780 **Figure 2**

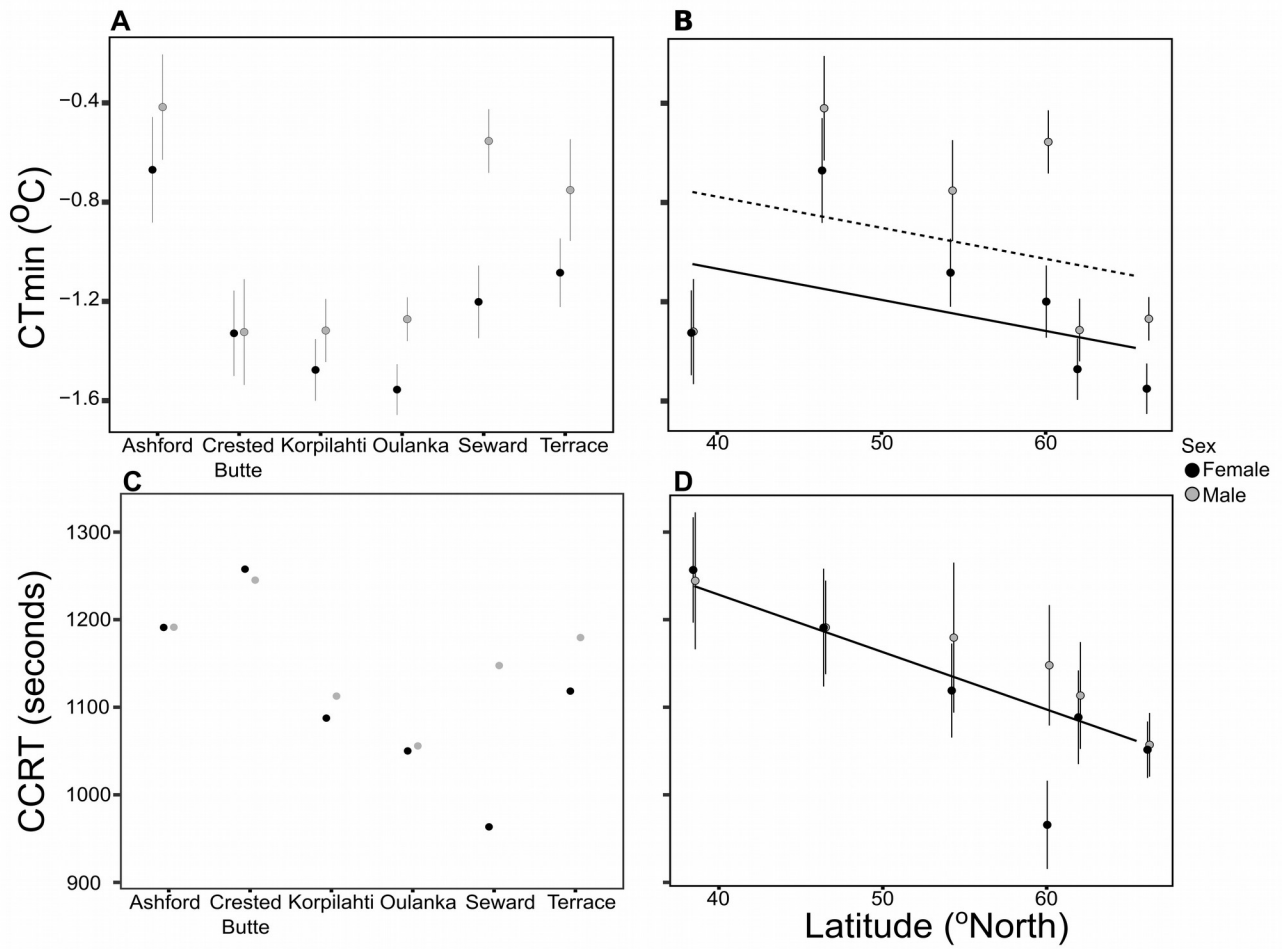

783

Figure 3.

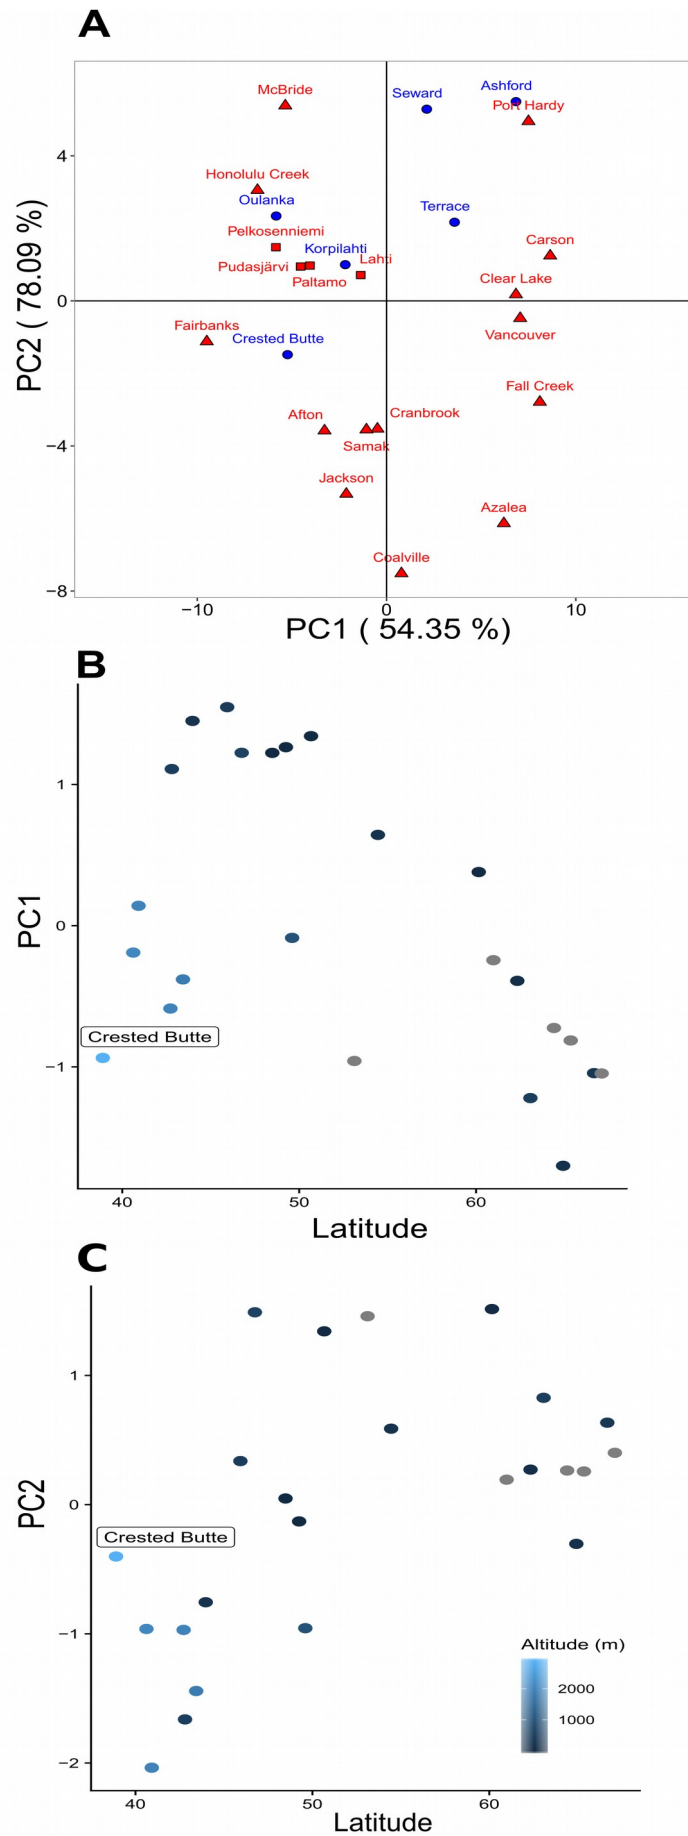

Figure 4.

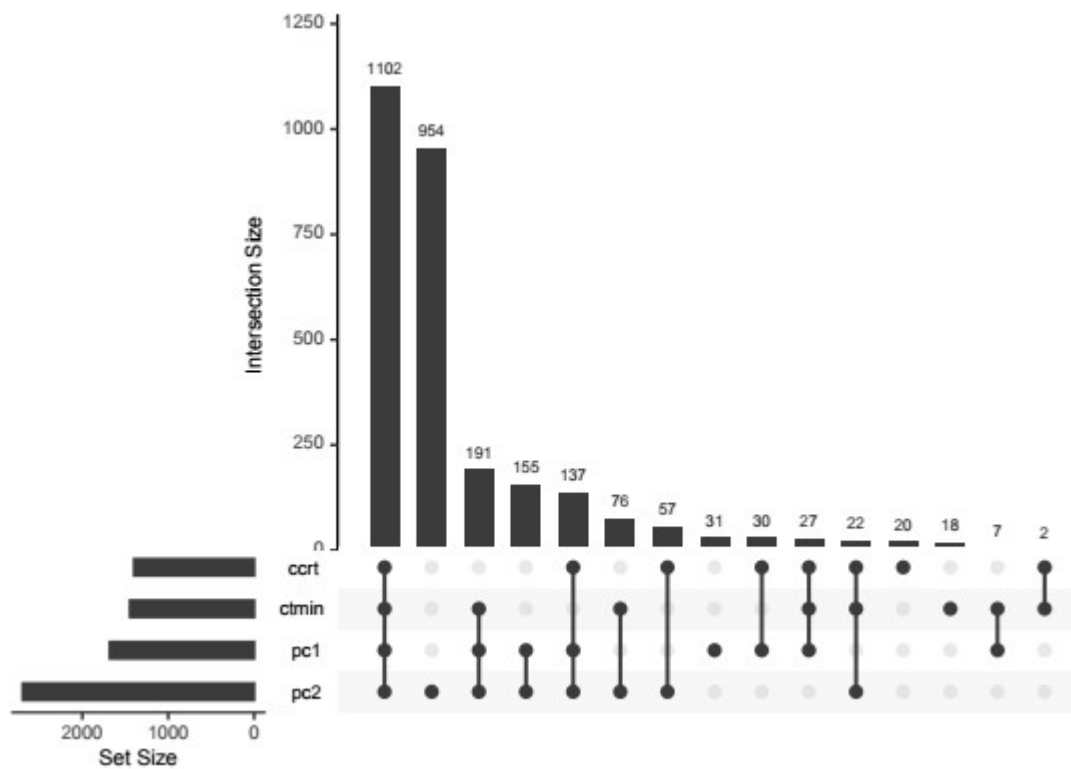

Source: https://www.biorxiv.org/content/10.1101/2020.04.20.050450v1.full.pdf
